# Supplementary material for: Comparative analysis of chloroplast genomes on Meliaceae species: insights into the evolution and species identification
Source: Front Plant Sci. 2025 Mar 11;16:1536313. doi: 10.3389/fpls.2025.1536313 (PMC11933007; doi:10.3389/fpls.2025.1536313)
Supplement: Supplementary file 3 [file Table2.xlsx]

## Sheet: Sheet1
Supplementary Table 2 List of estimated divergence time in major nodes
Node	Divergence time (Ma)	95%HPD (Ma)
Meliaceae crown	72.92	60.62-87.01
Melioideae crown	66.6	55.41-79.73
Cedreloideae crown	47.86	47.42-48.22
I clade crown	40.28	38.02-42.48
II clade crown	46.18	45.02-47.23
III clade crown	46.87	37.78-58.92
IV clade crown	30.18	15.09-47.49
Khaya	9.59	2.79-17.14
Swietenia	22.4	22.07-22.85
Xylocarpus	17.39	8.59-25.62
Carapa	29.9	22.28-36.2
Entandrophragma	29.46	21.79-38.22
Lovoa	24.85	14.67-35.36
Toona	14.91	9.42-20.08
Cedrela	28.12	27.71-28.51
Leplaea	22.23	18.05-25.46
Turraeanthus	26.48	23.81-29.66
Lansium	19.81	17.89-21.5
Aglaia	19.81	17.89-21.5
Aphanamixis	23	22.6-23.4
Cipadessa	31.31	27.24-36.06
Heynea	46.18	45.02-47.23
Melia	30.18	15.09-47.49
Azadirachta	15.93	5.06-27.86
							t_n51
