# Supplementary material for: Comparative analysis of chloroplast genomes on Meliaceae species: insights into the evolution and species identification
Source: Front Plant Sci. 2025 Mar 11;16:1536313. doi: 10.3389/fpls.2025.1536313 (PMC11933007; doi:10.3389/fpls.2025.1536313)
Supplement: Supplementary file 4 [file Table3.xlsx]

## Sheet: Sheet1
Table S3 Simple sequence repeats in the cp genomes of Meliaceae species
	A/T	C/G	AT/AT	AC/GT	AG/CT	AAC/GTT	AAG/CTT	AAT/ATT	AAAG/CTTT	AAAT/ATTT	AACG/CGTT	AACT/AGTT	AAGT/ACTT	AATG/ATTC	AATT/AATT	ACAT/ATGT	AGAT/ATCT	AAAAG/CTTTT	AAAAT/ATTTT	AAATT/AATTT	AATAG/ATTCT	AATTC/AATTG	AAAAAG/CTTTTT	AAAAGT/ACTTTT	AACGAT/ATCGTT	AAGAAT/ATTCTT	AAGTAT/ACTTAT	AATATT/AATATT
K. senegalensis	59	1	5	0	1	0	2	2	1	3	1	1	1	1	0	1	2	0	0	1	1	0	0	0	0	0	0	0
K. grandifoliola	59	1	5	0	1	0	2	2	1	3	1	1	1	1	0	1	2	0	0	1	1	0	0	0	0	0	0	0
K. ivorensis	63	2	5	0	1	0	2	2	1	3	1	1	1	1	0	1	2	0	0	1	0	0	0	0	0	0	0	0
K. anthotheca	60	4	5	0	1	0	2	2	1	3	1	1	1	1	0	1	2	0	0	1	1	0	0	0	0	0	0	0
S. mahagoni	72	3	4	0	1	0	2	1	1	3	1	1	1	1	0	1	3	0	0	1	1	0	0	0	0	0	0	0
S. macrophylla	72	3	4	0	1	0	2	1	1	3	1	1	1	1	0	1	3	0	0	1	1	0	0	0	0	0	0	0
X. rumphii	72	1	5	0	1	0	4	2	1	2	1	1	1	1	0	1	3	1	0	1	1	0	0	0	0	0	0	0
X. moluccensis	70	1	5	0	1	0	4	2	1	2	1	1	1	1	0	1	3	1	0	1	1	0	0	0	0	0	0	0
X. granatum	72	1	4	0	1	0	2	2	1	2	1	1	1	1	0	1	3	1	0	1	1	0	1	0	0	0	0	0
Ca. guianensis	72	1	4	0	1	0	2	2	1	2	1	1	1	1	0	1	3	1	0	1	1	0	1	0	0	0	0	0
E. utile	73	3	7	0	1	0	2	1	1	2	1	2	1	1	0	1	3	0	0	1	0	0	0	0	0	0	0	0
E. cylindricum	81	1	6	0	1	0	2	3	1	3	1	1	1	1	0	1	3	0	0	1	1	0	0	0	0	0	0	0
E. angolense	80	1	6	0	1	0	2	2	1	3	1	1	1	1	0	1	3	0	0	1	1	0	0	0	0	0	0	0
E. candollei	76	2	7	0	1	0	2	1	1	1	1	1	1	1	1	1	3	0	0	1	1	0	0	0	0	0	0	0
Lo. swynnertonii	65	0	4	0	1	0	3	2	1	2	1	1	1	0	0	1	4	0	0	1	1	0	0	0	0	0	0	0
Lo. trichilioides	57	5	4	0	1	0	5	3	1	4	1	1	1	0	0	0	3	0	0	1	1	0	0	0	1	0	0	0
T. fargesii	69	0	6	0	2	0	2	3	1	3	0	0	0	1	0	1	4	0	0	1	1	0	0	0	0	0	0	0
T. ciliata	70	1	6	0	2	0	2	3	1	3	1	0	0	1	0	1	4	0	0	1	0	0	0	0	0	0	0	0
T. sinensis	66	0	7	0	2	0	2	2	1	3	1	0	0	0	0	1	4	0	0	1	1	0	0	0	0	0	0	0
Ce. odorata	38	1	5	0	2	0	0	4	0	2	0	0	0	1	0	1	4	0	0	1	1	0	1	1	0	0	0	0
L. laurentii	33	1	5	1	1	0	1	4	0	2	0	1	0	0	0	0	3	0	0	0	1	0	0	0	0	0	1	0
L. thompsonii	32	0	5	1	1	0	1	4	0	2	0	1	0	0	0	0	3	0	0	0	1	0	0	0	0	0	1	0
L. cedrata	60	0	8	1	1	0	2	5	1	3	0	1	0	0	0	1	3	0	0	1	0	0	0	0	0	3	0	0
Tu. africanus	81	0	10	1	1	0	2	4	1	2	0	1	0	0	0	1	3	0	0	0	0	0	0	0	0	0	0	0
La. domesticum	55	0	9	1	1	0	2	5	1	4	0	1	0	0	0	1	2	0	0	1	0	0	0	0	0	0	0	0
Ag. odorata	85	0	9	1	0	0	3	6	2	3	0	1	0	0	0	0	2	0	1	1	1	1	0	0	0	0	0	0
Ap. polystachya	71	0	7	1	1	0	2	5	1	3	0	1	0	0	0	1	2	0	1	1	1	0	0	0	0	0	0	0
Ci. cinerascens	55	0	5	1	0	0	2	6	1	2	0	0	0	0	0	1	3	0	0	1	1	0	0	0	0	0	0	1
H. velutina	72	2	8	1	1	1	4	6	1	2	1	1	0	1	0	1	4	0	0	0	2	0	0	0	0	0	0	0
M. azedarach	73	2	9	0	1	0	2	3	0	2	1	0	0	1	0	1	3	0	0	0	0	0	0	0	0	0	0	0
A. siamensis	60	2	7	0	1	0	2	6	0	2	1	1	0	1	0	1	1	0	1	0	0	0	0	0	0	0	0	0
A. indica	59	2	7	0	1	0	2	5	0	3	1	1	0	2	0	1	1	0	0	0	0	0	0	0	0	0	0	0
Le. floridana	86	2	9	1	0	0	4	4	1	4	1	0	0	1	0	1	2	0	0	0	0	0	0	0	0	0	0	0
