# Supplementary material for: Comparative analysis of chloroplast genomes on Meliaceae species: insights into the evolution and species identification
Source: Front Plant Sci. 2025 Mar 11;16:1536313. doi: 10.3389/fpls.2025.1536313 (PMC11933007; doi:10.3389/fpls.2025.1536313)
Supplement: Supplementary file 5 [file Table4.xlsx]

## Sheet: Sheet1
Supplementary Table 4 Codon usage details of Meliaceae
	K. senegalensis	K. grandifoliola	K. ivorensis	K. anthotheca	S. mahagoni	S. macrophylla	X. rumphii	X. moluccensis	X. granatum	Ca. guianensis	E. utile	E. cylindricum	E. angolense	E. candollei	Lo. swynnertonii	Lo. trichilioides	T. fargesii	T. ciliata	T. sinensis	Ce. odorata	L. laurentii	L. thompsonii	L. cedrata	Tu. africanus	La. domesticum	Ag. odorata	Ap. polystachya	Ci. cinerascens	H. velutina	M. azedarach	A. siamensis	A. indica
TAC	0.36	0.36	0.36	0.36	0.36	0.36	0.36	0.36	0.36	0.36	0.36	0.36	0.36	0.36	0.37	0.37	0.37	0.37	0.37	0.36	0.36	0.36	0.37	0.38	0.36	0.37	0.37	0.37	0.37	0.38	0.37	0.37
CTC	0.37	0.37	0.37	0.37	0.38	0.38	0.37	0.36	0.39	0.38	0.37	0.37	0.37	0.37	0.37	0.38	0.37	0.37	0.36	0.37	0.36	0.36	0.37	0.37	0.36	0.37	0.36	0.36	0.36	0.35	0.36	0.37
AGC	0.37	0.37	0.37	0.38	0.39	0.39	0.37	0.38	0.4	0.38	0.39	0.39	0.39	0.39	0.38	0.39	0.38	0.37	0.38	0.38	0.37	0.37	0.37	0.37	0.37	0.37	0.37	0.37	0.36	0.34	0.38	0.4
GGC	0.39	0.39	0.39	0.39	0.39	0.39	0.38	0.38	0.38	0.39	0.38	0.39	0.38	0.39	0.39	0.39	0.38	0.38	0.38	0.38	0.36	0.36	0.36	0.36	0.35	0.35	0.35	0.38	0.37	0.36	0.36	0.36
GAC	0.42	0.42	0.42	0.42	0.41	0.41	0.41	0.41	0.4	0.41	0.43	0.43	0.43	0.43	0.42	0.42	0.43	0.43	0.43	0.42	0.41	0.41	0.41	0.41	0.41	0.41	0.41	0.41	0.39	0.39	0.41	0.41
CTG	0.43	0.43	0.43	0.43	0.42	0.42	0.42	0.42	0.41	0.42	0.44	0.44	0.43	0.44	0.43	0.43	0.43	0.42	0.43	0.42	0.43	0.43	0.43	0.42	0.43	0.42	0.42	0.44	0.4	0.41	0.42	0.43
AAC	0.46	0.46	0.46	0.46	0.46	0.46	0.47	0.46	0.48	0.45	0.45	0.45	0.45	0.45	0.46	0.46	0.45	0.45	0.44	0.45	0.46	0.46	0.46	0.46	0.46	0.45	0.45	0.45	0.44	0.45	0.45	0.45
CGC	0.47	0.47	0.47	0.47	0.47	0.47	0.44	0.45	0.46	0.47	0.45	0.46	0.46	0.46	0.46	0.45	0.46	0.46	0.46	0.46	0.46	0.46	0.46	0.45	0.47	0.47	0.47	0.47	0.48	0.43	0.43	0.42
CAG	0.47	0.47	0.47	0.47	0.49	0.49	0.48	0.48	0.5	0.49	0.47	0.47	0.47	0.47	0.47	0.47	0.47	0.48	0.48	0.5	0.45	0.45	0.45	0.45	0.44	0.45	0.45	0.45	0.46	0.46	0.44	0.44
GCG	0.48	0.48	0.48	0.48	0.48	0.48	0.46	0.46	0.47	0.47	0.48	0.48	0.49	0.48	0.5	0.49	0.48	0.48	0.48	0.49	0.49	0.49	0.5	0.49	0.51	0.5	0.49	0.5	0.48	0.46	0.48	0.48
CGG	0.48	0.48	0.48	0.48	0.47	0.47	0.48	0.49	0.47	0.47	0.5	0.49	0.5	0.5	0.48	0.5	0.49	0.5	0.5	0.48	0.52	0.52	0.52	0.52	0.52	0.5	0.51	0.52	0.49	0.45	0.5	0.5
ACG	0.48	0.48	0.48	0.48	0.47	0.47	0.47	0.47	0.46	0.47	0.47	0.47	0.46	0.47	0.48	0.5	0.47	0.48	0.49	0.45	0.43	0.43	0.44	0.44	0.44	0.43	0.44	0.44	0.4	0.46	0.49	0.49
GAG	0.49	0.49	0.49	0.49	0.49	0.49	0.49	0.49	0.5	0.49	0.49	0.49	0.49	0.48	0.48	0.49	0.48	0.48	0.47	0.48	0.49	0.49	0.49	0.5	0.49	0.49	0.49	0.48	0.48	0.47	0.48	0.48
GTC	0.49	0.49	0.48	0.48	0.47	0.47	0.48	0.47	0.48	0.49	0.47	0.48	0.47	0.48	0.49	0.5	0.48	0.47	0.48	0.49	0.45	0.45	0.45	0.45	0.46	0.46	0.46	0.44	0.47	0.47	0.46	0.46
AAG	0.5	0.5	0.5	0.49	0.52	0.52	0.48	0.48	0.51	0.49	0.5	0.5	0.5	0.51	0.5	0.49	0.49	0.49	0.49	0.48	0.49	0.49	0.5	0.5	0.48	0.49	0.49	0.51	0.5	0.48	0.48	0.49
CCG	0.52	0.52	0.52	0.52	0.54	0.54	0.54	0.53	0.57	0.52	0.54	0.55	0.55	0.54	0.55	0.55	0.55	0.56	0.55	0.54	0.53	0.53	0.53	0.54	0.51	0.53	0.51	0.54	0.56	0.5	0.52	0.55
CAC	0.53	0.53	0.53	0.53	0.52	0.52	0.52	0.53	0.52	0.54	0.53	0.53	0.53	0.53	0.53	0.53	0.53	0.52	0.53	0.54	0.54	0.54	0.54	0.53	0.53	0.53	0.52	0.54	0.54	0.56	0.53	0.54
GTG	0.53	0.53	0.53	0.53	0.53	0.53	0.52	0.53	0.53	0.51	0.54	0.54	0.54	0.54	0.53	0.53	0.52	0.52	0.52	0.52	0.55	0.55	0.55	0.55	0.55	0.55	0.55	0.55	0.56	0.53	0.53	0.55
TGC	0.56	0.56	0.56	0.56	0.57	0.57	0.54	0.54	0.55	0.55	0.55	0.55	0.55	0.56	0.56	0.56	0.56	0.54	0.55	0.57	0.54	0.54	0.54	0.55	0.52	0.53	0.52	0.54	0.51	0.55	0.55	0.53
TGA	0.57	0.57	0.57	0.57	0.58	0.58	0.57	0.57	0.53	0.59	0.57	0.62	0.57	0.62	0.69	0.51	0.57	0.57	0.57	0.54	0.57	0.57	0.62	0.62	0.63	0.63	0.63	0.62	0.71	0.59	0.52	0.52
TCG	0.6	0.6	0.6	0.61	0.59	0.59	0.61	0.6	0.61	0.63	0.59	0.6	0.59	0.6	0.62	0.6	0.6	0.6	0.61	0.61	0.58	0.58	0.58	0.58	0.58	0.59	0.58	0.59	0.61	0.57	0.54	0.54
AGG	0.61	0.61	0.62	0.61	0.65	0.65	0.62	0.62	0.66	0.62	0.6	0.6	0.6	0.6	0.59	0.62	0.61	0.61	0.61	0.59	0.63	0.63	0.62	0.62	0.64	0.62	0.63	0.62	0.64	0.61	0.6	0.59
GCC	0.62	0.62	0.62	0.62	0.63	0.63	0.63	0.63	0.64	0.64	0.62	0.62	0.62	0.62	0.63	0.64	0.62	0.62	0.61	0.62	0.62	0.62	0.62	0.62	0.63	0.62	0.63	0.63	0.63	0.61	0.63	0.63
ATC	0.62	0.62	0.63	0.63	0.63	0.63	0.63	0.63	0.63	0.63	0.62	0.62	0.62	0.62	0.65	0.64	0.63	0.63	0.63	0.62	0.62	0.62	0.62	0.61	0.61	0.61	0.61	0.62	0.63	0.58	0.61	0.6
TTC	0.69	0.69	0.69	0.69	0.7	0.7	0.68	0.68	0.69	0.69	0.68	0.68	0.68	0.69	0.69	0.68	0.68	0.68	0.68	0.67	0.68	0.68	0.68	0.69	0.68	0.68	0.68	0.68	0.69	0.66	0.69	0.68
GGG	0.7	0.7	0.7	0.7	0.73	0.73	0.69	0.7	0.71	0.68	0.7	0.7	0.7	0.7	0.71	0.7	0.7	0.7	0.69	0.68	0.68	0.68	0.68	0.68	0.68	0.68	0.68	0.68	0.7	0.73	0.71	0.7
TAG	0.74	0.74	0.74	0.74	0.69	0.69	0.74	0.74	0.71	0.65	0.74	0.68	0.74	0.68	0.69	0.74	0.74	0.79	0.68	0.66	0.62	0.62	0.68	0.62	0.69	0.69	0.58	0.74	0.53	0.76	0.81	0.81
ACC	0.76	0.76	0.76	0.76	0.75	0.75	0.77	0.76	0.77	0.74	0.75	0.75	0.75	0.76	0.77	0.77	0.77	0.77	0.78	0.75	0.76	0.76	0.77	0.76	0.75	0.77	0.76	0.75	0.77	0.75	0.73	0.74
CTA	0.82	0.82	0.82	0.82	0.81	0.81	0.82	0.82	0.79	0.81	0.81	0.83	0.82	0.82	0.83	0.82	0.83	0.83	0.83	0.82	0.83	0.83	0.82	0.83	0.83	0.83	0.84	0.83	0.82	0.77	0.81	0.81
CCC	0.83	0.83	0.83	0.83	0.8	0.8	0.82	0.82	0.82	0.82	0.83	0.83	0.81	0.82	0.82	0.84	0.82	0.83	0.82	0.82	0.8	0.8	0.81	0.79	0.83	0.8	0.83	0.83	0.84	0.77	0.78	0.76
ATA	0.9	0.9	0.9	0.9	0.88	0.88	0.91	0.91	0.88	0.89	0.91	0.92	0.92	0.91	0.88	0.89	0.9	0.9	0.9	0.91	0.92	0.92	0.91	0.92	0.92	0.91	0.92	0.91	0.87	0.9	0.91	0.9
ATG	1	1	1	1	1	1	1	1	1	1	1	1	1	1	1	1	1	1	1	1	1	1	1	1	1	1	1	1	1	1	1	1
TGG	1	1	1	1	1	1	1	1	1	1	1	1	1	1	1	1	1	1	1	1	1	1	1	1	1	1	1	1	1	1	1	1
TCC	1.02	1.02	1.02	1.01	1.03	1.03	0.99	0.99	0.97	0.97	0.99	0.99	1	1	0.98	0.99	1	1.01	0.97	0.99	0.99	0.99	0.99	0.99	1	0.99	0.98	0.99	0.93	0.97	0.97	0.96
GCA	1.1	1.1	1.11	1.11	1.08	1.08	1.13	1.14	1.08	1.11	1.12	1.12	1.11	1.11	1.09	1.09	1.11	1.11	1.11	1.11	1.1	1.1	1.1	1.1	1.1	1.1	1.1	1.1	1.09	1.16	1.12	1.13
CCA	1.1	1.1	1.1	1.1	1.07	1.07	1.1	1.1	1.06	1.08	1.07	1.08	1.08	1.09	1.08	1.06	1.06	1.06	1.06	1.06	1.08	1.08	1.08	1.1	1.09	1.1	1.08	1.09	1.06	1.11	1.12	1.12
TCA	1.15	1.15	1.15	1.15	1.13	1.13	1.15	1.15	1.13	1.18	1.17	1.17	1.18	1.16	1.17	1.17	1.18	1.17	1.17	1.19	1.17	1.17	1.17	1.18	1.16	1.16	1.15	1.16	1.16	1.18	1.22	1.21
ACA	1.2	1.2	1.19	1.19	1.2	1.2	1.2	1.19	1.19	1.23	1.21	1.22	1.22	1.2	1.2	1.18	1.21	1.21	1.21	1.23	1.23	1.23	1.23	1.22	1.22	1.25	1.22	1.23	1.21	1.24	1.19	1.2
TTG	1.21	1.21	1.22	1.22	1.24	1.24	1.23	1.23	1.27	1.25	1.22	1.22	1.23	1.23	1.24	1.23	1.22	1.23	1.23	1.25	1.21	1.22	1.22	1.21	1.22	1.21	1.22	1.21	1.27	1.28	1.27	1.25
AGT	1.24	1.24	1.24	1.24	1.26	1.26	1.25	1.24	1.27	1.26	1.24	1.24	1.22	1.24	1.23	1.21	1.24	1.25	1.25	1.24	1.27	1.27	1.26	1.26	1.26	1.25	1.26	1.24	1.28	1.32	1.24	1.23
CGT	1.26	1.26	1.26	1.26	1.29	1.29	1.26	1.26	1.29	1.24	1.25	1.25	1.25	1.24	1.26	1.25	1.25	1.24	1.26	1.24	1.24	1.24	1.26	1.25	1.24	1.25	1.26	1.23	1.25	1.31	1.28	1.27
CTT	1.28	1.28	1.27	1.27	1.27	1.27	1.27	1.27	1.28	1.27	1.28	1.26	1.27	1.27	1.27	1.27	1.26	1.26	1.26	1.27	1.26	1.26	1.26	1.28	1.26	1.26	1.26	1.26	1.29	1.24	1.25	1.24
TTT	1.31	1.31	1.31	1.31	1.3	1.3	1.32	1.32	1.31	1.31	1.32	1.32	1.32	1.31	1.31	1.32	1.32	1.32	1.32	1.33	1.32	1.32	1.32	1.31	1.32	1.32	1.32	1.32	1.31	1.34	1.31	1.32
GGT	1.33	1.33	1.34	1.33	1.33	1.33	1.34	1.34	1.35	1.34	1.33	1.33	1.34	1.33	1.33	1.34	1.33	1.33	1.33	1.33	1.35	1.35	1.36	1.36	1.36	1.37	1.37	1.35	1.33	1.34	1.34	1.34
CGA	1.41	1.41	1.4	1.41	1.42	1.42	1.37	1.37	1.42	1.42	1.4	1.41	1.4	1.42	1.4	1.41	1.42	1.42	1.41	1.43	1.39	1.39	1.39	1.4	1.36	1.39	1.37	1.38	1.37	1.43	1.43	1.44
TGT	1.44	1.44	1.44	1.44	1.43	1.43	1.46	1.46	1.45	1.45	1.45	1.45	1.45	1.44	1.44	1.44	1.44	1.46	1.45	1.43	1.46	1.46	1.46	1.45	1.48	1.47	1.48	1.46	1.49	1.45	1.45	1.47
CAT	1.47	1.47	1.47	1.47	1.48	1.48	1.48	1.47	1.48	1.46	1.47	1.47	1.47	1.47	1.47	1.47	1.47	1.48	1.47	1.46	1.46	1.46	1.46	1.47	1.47	1.47	1.48	1.46	1.46	1.44	1.47	1.46
ATT	1.48	1.48	1.47	1.47	1.49	1.49	1.47	1.47	1.5	1.48	1.47	1.46	1.47	1.47	1.47	1.47	1.48	1.46	1.47	1.47	1.47	1.46	1.47	1.47	1.47	1.48	1.46	1.47	1.5	1.52	1.48	1.5
GTT	1.48	1.48	1.48	1.48	1.47	1.47	1.47	1.48	1.44	1.48	1.48	1.48	1.49	1.48	1.47	1.48	1.49	1.49	1.49	1.5	1.48	1.48	1.48	1.47	1.48	1.48	1.47	1.48	1.44	1.47	1.5	1.5
AAA	1.5	1.5	1.5	1.51	1.48	1.48	1.52	1.52	1.49	1.51	1.5	1.5	1.5	1.49	1.5	1.51	1.51	1.51	1.51	1.52	1.51	1.51	1.5	1.5	1.52	1.51	1.51	1.49	1.5	1.52	1.52	1.51
GAA	1.51	1.51	1.51	1.51	1.51	1.51	1.51	1.51	1.5	1.51	1.51	1.51	1.51	1.52	1.52	1.51	1.52	1.52	1.53	1.52	1.51	1.51	1.51	1.5	1.51	1.51	1.51	1.52	1.52	1.53	1.52	1.52
GTA	1.51	1.51	1.5	1.51	1.53	1.53	1.52	1.52	1.55	1.52	1.51	1.5	1.49	1.51	1.51	1.5	1.51	1.51	1.51	1.5	1.52	1.52	1.52	1.53	1.52	1.5	1.52	1.53	1.53	1.53	1.52	1.5
CAA	1.53	1.53	1.53	1.53	1.51	1.51	1.52	1.52	1.5	1.51	1.53	1.53	1.53	1.53	1.53	1.53	1.53	1.52	1.52	1.5	1.55	1.55	1.55	1.55	1.56	1.55	1.55	1.55	1.54	1.54	1.56	1.56
AAT	1.54	1.54	1.54	1.54	1.54	1.54	1.53	1.54	1.52	1.55	1.55	1.55	1.55	1.55	1.54	1.54	1.55	1.55	1.56	1.55	1.54	1.54	1.54	1.54	1.54	1.55	1.55	1.55	1.56	1.55	1.55	1.55
CCT	1.55	1.55	1.55	1.55	1.59	1.59	1.55	1.54	1.55	1.58	1.56	1.55	1.56	1.55	1.55	1.55	1.56	1.56	1.56	1.58	1.58	1.58	1.58	1.57	1.57	1.57	1.57	1.54	1.54	1.63	1.58	1.58
ACT	1.56	1.56	1.56	1.56	1.57	1.57	1.56	1.57	1.58	1.57	1.57	1.56	1.57	1.56	1.55	1.56	1.55	1.55	1.53	1.57	1.58	1.58	1.57	1.58	1.6	1.55	1.58	1.57	1.62	1.55	1.59	1.58
GAT	1.58	1.58	1.58	1.58	1.59	1.59	1.59	1.59	1.6	1.59	1.57	1.57	1.57	1.57	1.58	1.58	1.57	1.57	1.57	1.58	1.59	1.59	1.59	1.59	1.59	1.59	1.59	1.59	1.61	1.61	1.59	1.59
GGA	1.58	1.58	1.58	1.58	1.55	1.55	1.59	1.59	1.56	1.59	1.58	1.58	1.58	1.58	1.58	1.57	1.59	1.59	1.59	1.61	1.61	1.61	1.6	1.6	1.61	1.6	1.61	1.59	1.59	1.57	1.59	1.61
TCT	1.61	1.61	1.61	1.61	1.6	1.6	1.62	1.63	1.62	1.58	1.62	1.62	1.61	1.61	1.63	1.62	1.6	1.6	1.62	1.59	1.62	1.62	1.63	1.62	1.64	1.63	1.66	1.65	1.66	1.64	1.66	1.66
TAT	1.64	1.64	1.64	1.64	1.64	1.64	1.64	1.64	1.64	1.64	1.64	1.64	1.64	1.64	1.63	1.63	1.63	1.63	1.63	1.64	1.64	1.64	1.63	1.62	1.64	1.63	1.63	1.63	1.63	1.62	1.63	1.63
TAA	1.7	1.7	1.7	1.7	1.73	1.73	1.7	1.7	1.76	1.76	1.7	1.7	1.7	1.7	1.62	1.75	1.7	1.64	1.75	1.8	1.81	1.81	1.7	1.75	1.67	1.67	1.79	1.64	1.76	1.65	1.67	1.67
AGA	1.77	1.77	1.77	1.77	1.7	1.7	1.82	1.81	1.69	1.77	1.79	1.79	1.8	1.78	1.81	1.78	1.77	1.77	1.77	1.78	1.76	1.76	1.75	1.77	1.77	1.78	1.76	1.77	1.77	1.76	1.77	1.78
GCT	1.79	1.79	1.79	1.79	1.81	1.81	1.78	1.77	1.81	1.78	1.78	1.78	1.78	1.78	1.79	1.77	1.79	1.79	1.79	1.78	1.78	1.78	1.78	1.79	1.77	1.78	1.77	1.77	1.8	1.77	1.76	1.76
TTA	1.89	1.89	1.88	1.88	1.87	1.87	1.89	1.89	1.86	1.86	1.88	1.88	1.89	1.88	1.86	1.88	1.88	1.89	1.89	1.88	1.9	1.9	1.9	1.9	1.9	1.91	1.9	1.9	1.86	1.94	1.9	1.9
