# Supplementary material for: Comparative analysis of chloroplast genomes on Meliaceae species: insights into the evolution and species identification
Source: Front Plant Sci. 2025 Mar 11;16:1536313. doi: 10.3389/fpls.2025.1536313 (PMC11933007; doi:10.3389/fpls.2025.1536313)
Supplement: Supplementary file 6 [file Table5.xlsx]

## Sheet: Sheet1
Table S5 Comparison of the divergence time of Meliaceae species
	Meliaceae	References	Materials
1	67.5 Ma, 95% HPD: 51.8-86.4 Ma	Guo et al., 2018	five cpDNA loci	psbA-trnH, trnC-ycf6, trnH-trnK, trnS-trnG and trnT-trnL
2	79.60 Ma, 95% HPD: 69.66-89.77 Ma	Muellner et al., 2016	three cpDNA loci	atpB, trnL-trnF and rbcL
3	80.4 Ma, 95% HPD:69.1-91.6 Ma	Koenen et al., 2015	ITS region + four cpDNA loci	the ITS region of the nuclear genome and cp genes (rbcL, matK, rps16 and ycf1)
4	73.0 Ma, 95% HPD: 61.4-83.9 Ma	Muellner et al., 2007	two cpDNA loci	rbcL, atpB
